# Supplementary material for: A DFT approach to the charge transport related properties in columnar stacked π-conjugated N-heterocycle cores including electron donor and acceptor units
Source: Royal Society of Chemistry journal article supplement (doi:10.1039/c4cp04220d), 2014-11-07
Supplement: c4cp04220d1.pdf [file c4cp04220d1.pdf]

## Supplementary material

DFT approach to the charge transport related properties in columnar stacked  $\pi$ -conjugated N-heterocycles cores including electron donor and acceptor units

CP-ART-09-2014-004220

Amparo Navarro<sup>a</sup>, M. Paz Fernández-Liencre<sup>a</sup>, Gregorio García<sup>b</sup>,

José M. Granadino-Roldán<sup>a</sup> and Manuel Fernández-Gómez<sup>a\*</sup>

<sup>a</sup>Departamento de Química Física y Analítica. Facultad de CC. Experimentales,  
Universidad de Jaén. Paraje las Lagunillas, E23071, Jaén, Spain.

<sup>b</sup>Departamento de Química, Universidad de Burgos,  
Plaza Misael Bañuelos E09001 Burgos, Spain.

\*Author for correspondence: [mfg@ujaen.es](mailto:mfg@ujaen.es); phone: +34-953212148

## SOME COMMENTS ABOUT THE QTAIM ANALYSIS

The eigenvalues  $\lambda_i$  of the Hessian matrix of electron density  $\rho_b$  rule the criteria for classifying the so-called critical points, CP, according to two indexes, i.e. (r, s). Here, r and s stand for the number of non-null  $\lambda_i$  and the difference between the number of positive and negative  $\lambda_i$ , respectively. Thus, CPs (3,-1) mean bond critical points (BCP), CPs (3, 1) mean ring critical point (RCP) and CPs (3, 3) mean cage critical point (CCP).

The sign of the Laplacian of electron density,  $\nabla^2\rho_b$ , at these CPs points the charge density is either locally concentrated [ $\nabla^2\rho_b < 0$ ] or locally depleted [ $\nabla^2\rho_b > 0$ ]. In the former case, the electrons are shared by both nuclei and it is typical for covalent interactions. The latter case is associated with closed-shell type interactions, such as H-bonds, ionic bonding, and even van der Waals interactions.

An energy interpretation of these kind of interactions can be performed through the virial theorem which relates  $\nabla^2\rho_b$  to the values of the potential,  $V_b < 0$ , and kinetic,  $G_b > 0$ , energy densities at the CP, for a system in electrostatic equilibrium. Thus, the stability of the shared interaction in regions where  $\nabla^2\rho_b < 0$  is due to the lowering of potential energy term, while for closed-shell interactions,  $\nabla^2\rho_b > 0$ , the kinetic energy term is the dominant one.

In addition, Cremer and Kraka have proposed the use of the total energy density,  $H_b$ , evaluated at the CP, defined as  $H_b = V_b + G_b$ .<sup>1</sup>  $H_b$  takes negative values for shared-type atomic interactions and reflects the covalent character of the bonding, while positive values for  $H_b$  are associated to closed-shell interactions.

Furthermore, in order to characterize the strength of closed-shell interactions we have calculated the indexes  $|V_b|/G_b$  and bond-degree (BD)  $H_b/\rho_b$ .<sup>2</sup> The BD index can be interpreted as the softening degree (SD) for interactions where  $H_b > 0$  in such a way that the weaker the interaction the greater the SD index. As stated by Matta and Boyd  $|V_b|/G_b < 1$  for pure closed-shell type interactions as it is the case of the H-bonds described above.<sup>3</sup>

The dependence of  $|V_b|/G_b$  and SD with the interatomic distance is plotted in Figures 3S and 4S, respectively. Thus, the ratio  $|V_b|/G_b$  increases from 0 to 1, leading to a decrease of SD as the internuclear distance shortens, and then, closed-shell interactions become stronger.

As seen in Table 1S, the BCPs associated to intramolecular, H-bond interactions observed for each (2,3) and (2,4) couples were also found in the corresponding single molecule. Thus,  $S_{\text{thio}} \cdots H_{\text{carb}}$  contacts are found for *1b*, *1c* and *2c*. However, despite  $H_{\text{carb}}$  only intervenes in the  $C_{\text{thio}} \cdots H_{\text{carb}}$  contacts in single *1b* and *1c*, new  $H_{\text{thio}} \cdots H_{\text{carb}}$  contacts appeared in the couple *1c*. Finally, as discussed for the single disc,  $N_{\text{triazol}}$  atoms are H-bonded with methoxyphenyl (*2a*), and thiophene in (*2b*, *2c*).

For couples (2, 3) of *1a* and *1b*, there are two ( $C_{\text{triaz}} \cdots C_{\text{triaz}}$ ) BCPs and four ( $C_{\text{triaz}} \cdots N_{\text{triaz}}$ ) BCPs, while for *1c* only one ( $C_{\text{triaz}} \cdots N_{\text{triaz}}$ ) BCP is found connecting neighboring triazine rings. Also, two (six) BCPs ( $S_{\text{thio}} \cdots C_{\text{thio}}$ ) between consecutive discs for *1b(1c)* are found. Note that for tristriazolotriazine derivatives, the number of BCPs ( $C_{\text{triaz}} \cdots N_{\text{triaz}}$ ) for (2, 3) couples associated to neighboring discs increases from three (*2a*), nine (*2b*) to eleven (*2c*).

For triazine derivatives, however, the total number of BCPs for (2, 3) couples increases from two in *1a* ( $C_{\text{triaz}} \cdots C_{\text{triaz}}$ ), six in *1b* (two  $S_{\text{thio}} \cdots C_{\text{thio}}$ , four  $C_{\text{triaz}} \cdots N_{\text{triaz}}$ ) to seven in *1c* (six  $S_{\text{thio}} \cdots C_{\text{thio}}$  and one  $C_{\text{triaz}} \cdots N_{\text{triaz}}$ ).

For *1b*, *1c* and *2c*, the distance between N-carbazolyl rings linked to (2,4) couples is around 3.8 Å and they stack in an almost parallel arrangement giving rise to a richer, intermolecular network and then to an ordered, helical structure.

(1) D. Cremer, E. Kraka, *Angew. Chem.*, 1984, **23**, 627-628

(2) E. Espinosa, I. Alkorta, J. Elguero, E. Molins, *J. Chem. Phys.*, 2002, **117**, 5529-5542

(3) C. Matta, R.J. Boyd, *The Quantum Theory of Atoms in Molecules*, Wiley-VCH, Weinheim, 2007.

**Figure 1S.** Rotational barrier for the dimer of 1a (left) and 2a (right) at B3LYP/6-31G\* level.

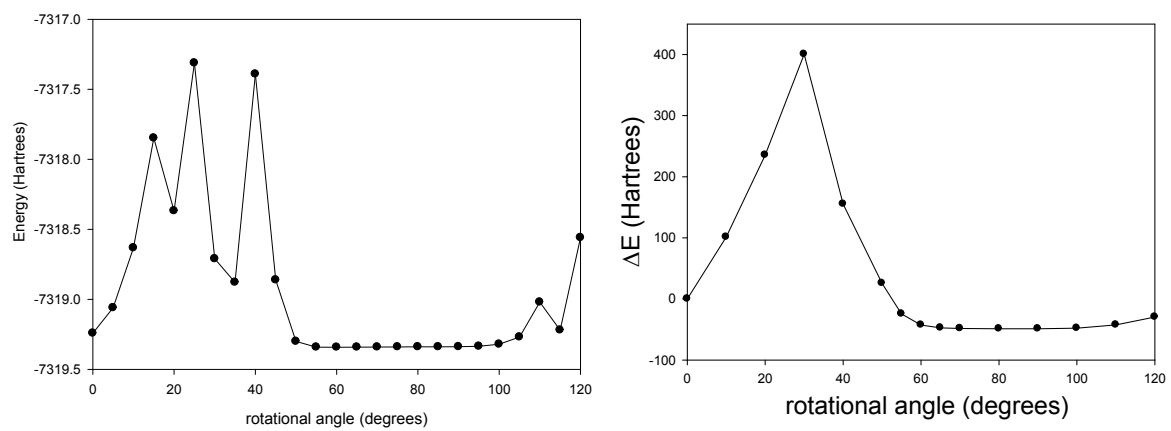

**Figure 2S.** Representation of the intramolecular bond paths (---) in single molecules of the selected compounds (o Hydrogen; ● Carbon; ● Oxygen; ● Sulfur; ● Nitrogen).

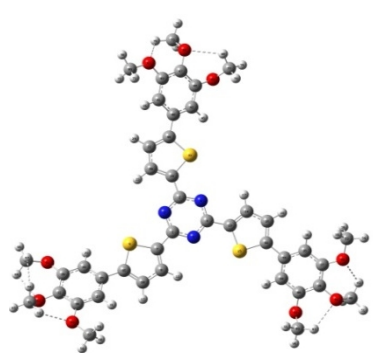

1a

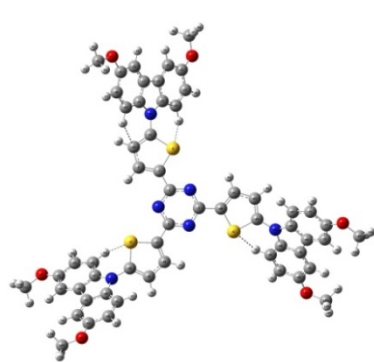

1b

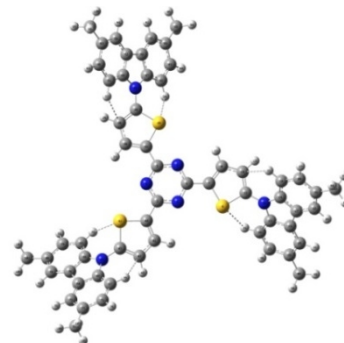

1c

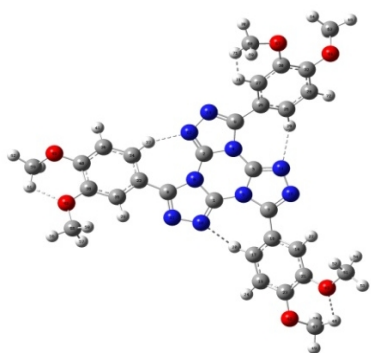

2a

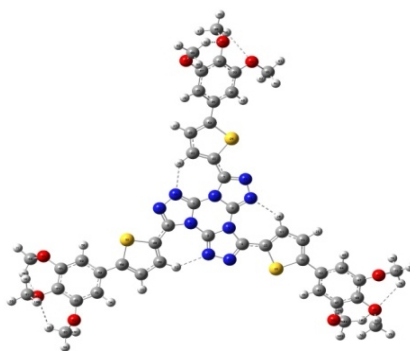

2b

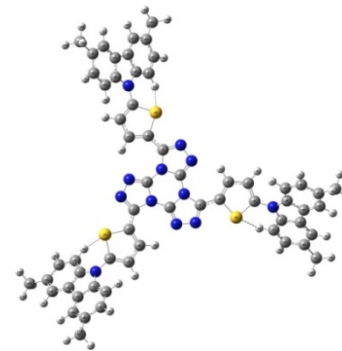

2c

**Figure 3S.** Dependence of  $|V_b|/G_b$  on the interatomic distance.

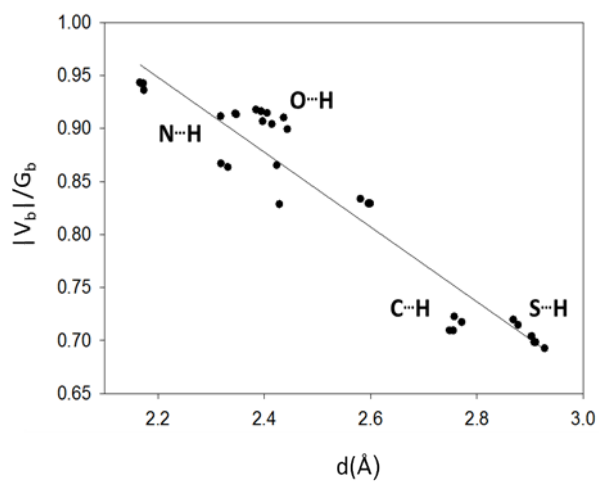

**Figure 4S:** Dependence of the bond-degree (BD)  $H_b/\rho_b$  on the interatomic distance.

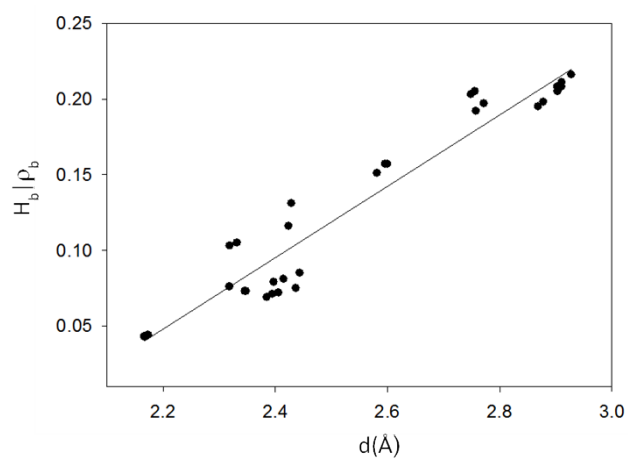

**Figure 5S.** Representation of the inter and intra molecular bond paths (---) for the (2,4) couples of the six clusters studied (o Hydrogen; • Carbon; • Oxygen; • Sulfur; • Nitrogen).

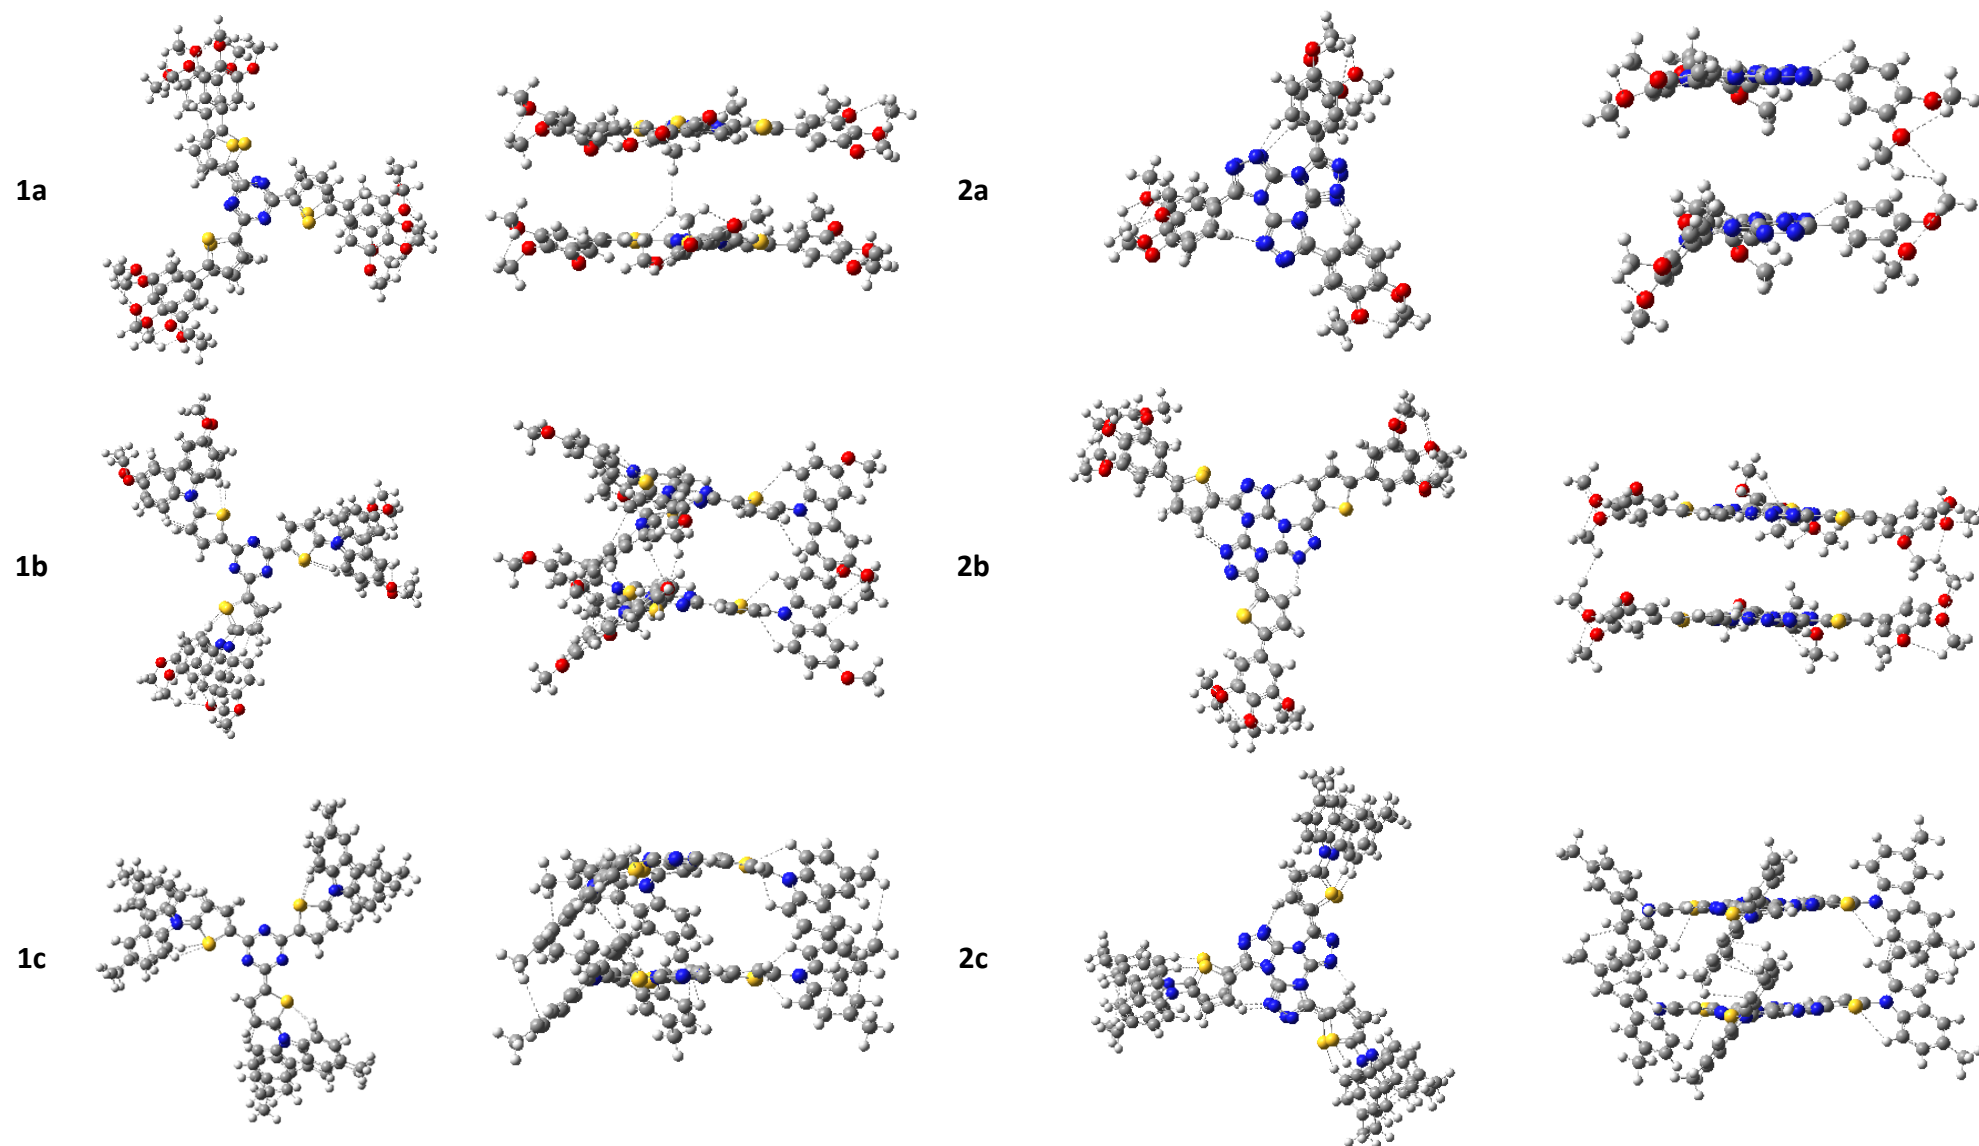



**Table 1S.** Topological properties for single disc and (2,3) and (2,4) couples of each compound studied at the B3LYP/6-31G\* level.**Single disc 1a.**

| Bond (X...Y) | $R_{AB}$ (Å) | $\rho_b$ (au) | $\nabla^2\rho_b$ (au) | $G_b$ (au) | $V_b$ (au) | $H_b$ (au) |
|--------------|--------------|---------------|-----------------------|------------|------------|------------|
| O52...H92    | 2.3975       | 0.0127        | 0.0466                | 0.0107     | -0.0097    | 0.0010     |
| O84...H49    | 2.5815       | 0.0086        | 0.0362                | 0.0078     | -0.0065    | 0.0013     |
| O83...H62    | 2.3186       | 0.0145        | 0.0538                | 0.0124     | -0.0113    | 0.0011     |
| O82...H68    | 2.4241       | 0.0146        | 0.0573                | 0.0126     | -0.0109    | 0.0017     |
| O87...H76    | 2.5962       | 0.0083        | 0.0358                | 0.0076     | -0.0063    | 0.0013     |
| O86...H80    | 2.3947       | 0.0127        | 0.0469                | 0.0107     | -0.0098    | 0.0009     |

**Single disc 1b.**

| Bond (X...Y) | $R_{AB}$ (Å) | $\rho_b$ (au) | $\nabla^2\rho_b$ (au) | $G_b$ (au) | $V_b$ (au) | $H_b$ (au) |
|--------------|--------------|---------------|-----------------------|------------|------------|------------|
| S9...H24     | 2.903        | 0.0077        | 0.0281                | 0.0054     | -0.0038    | 0.0016     |
| S42...H75    | 2.911        | 0.0076        | 0.0276                | 0.0053     | -0.0037    | 0.0016     |
| S35...H54    | 2.928        | 0.0074        | 0.0270                | 0.0052     | -0.0036    | 0.0016     |
| C10...H21    | 2.772        | 0.0076        | 0.0276                | 0.0053     | -0.0038    | 0.0015     |

**Single disc 1c.**

| Bond (X...Y) | $R_{AB}$ (Å) | $\rho_b$ (au) | $\nabla^2\rho_b$ (au) | $G_b$ (au) | $V_b$ (au) | $H_b$ (au) |
|--------------|--------------|---------------|-----------------------|------------|------------|------------|
| S9...H24     | 2.877        | 0.0081        | 0.0292                | 0.0057     | -0.0057    | 0.0000     |
| S42...H75    | 2.869        | 0.0082        | 0.0296                | 0.0057     | -0.0041    | 0.0016     |
| S35...H54    | 2.878        | 0.0081        | 0.0292                | 0.0056     | -0.0040    | 0.0016     |
| C10...H21    | 2.756        | 0.0078        | 0.0283                | 0.0055     | -0.0039    | 0.0016     |
| C43...H72    | 2.749        | 0.0079        | 0.0285                | 0.0055     | -0.0039    | 0.0016     |
| C36...H57    | 2.758        | 0.0078        | 0.0282                | 0.0054     | -0.0039    | 0.0015     |

**Single disc 2a.**

| Bond (X...Y) | $R_{AB}$ (Å) | $\rho_b$ (au) | $\nabla^2\rho_b$ (au) | $G_b$ (au) | $V_b$ (au) | $H_b$ (au) |
|--------------|--------------|---------------|-----------------------|------------|------------|------------|
| N14...H29    | 2.429        | 0.0130        | 0.0463                | 0.0099     | -0.0082    | 0.0017     |
| N12...H37    | 2.332        | 0.0153        | 0.0531                | 0.0117     | -0.0101    | 0.0016     |
| N10...H20    | 2.319        | 0.0156        | 0.0541                | 0.0120     | -0.0104    | 0.0016     |
| O43...H48    | 2.348        | 0.0137        | 0.0504                | 0.0115     | -0.0105    | 0.0010     |
| O46...H61    | 2.346        | 0.0137        | 0.0506                | 0.0116     | -0.0106    | 0.0010     |
| H31...H71    | 1.418        | 0.0420        | 0.1417                | 0.0381     | -0.0408    | -0.0027    |

**Single disc 2b.**

| Bond (X...Y) | $R_{AB}$ (Å) | $\rho_b$ (au) | $\nabla^2\rho_b$ (au) | $G_b$ (au) | $V_b$ (au) | $H_b$ (au) |
|--------------|--------------|---------------|-----------------------|------------|------------|------------|
| O66...H86    | 2.600        | 0.0083        | 0.0358                | 0.0076     | -0.0063    | 0.0013     |
| O65...H91    | 2.385        | 0.0130        | 0.0476                | 0.0109     | -0.0100    | 0.0009     |
| O61...H70    | 2.437        | 0.0120        | 0.0441                | 0.0100     | -0.0091    | 0.0009     |
| O61...H95    | 2.415        | 0.0123        | 0.0454                | 0.0104     | -0.0094    | 0.0010     |
| O68...H105   | 2.444        | 0.0118        | 0.0437                | 0.0099     | -0.0089    | 0.0010     |
| O68...H74    | 2.406        | 0.0125        | 0.0460                | 0.0105     | -0.0096    | 0.0009     |
| N14...H20    | 2.170        | 0.0207        | 0.0662                | 0.0156     | -0.0147    | 0.0009     |
| N10...H26    | 2.173        | 0.0206        | 0.0660                | 0.0156     | -0.0147    | 0.0009     |
| N12...H32    | 2.174        | 0.0205        | 0.0659                | 0.0156     | -0.0146    | 0.0009     |

**Single disc 2c.**

| Bond (X...Y) | $R_{AB}$ (Å) | $\rho_b$ (au) | $\nabla^2\rho_b$ (au) | $G_b$ (au) | $V_b$ (au) | $H_b$ (au) |
|--------------|--------------|---------------|-----------------------|------------|------------|------------|
| S30...H44    | 2.9103       | 0.0077        | 0.0278                | 0.0053     | -0.0037    | 0.0016     |
| S24...H80    | 2.9083       | 0.0077        | 0.0279                | 0.0053     | -0.0037    | 0.0016     |
| S18...H62    | 2.9037       | 0.0078        | 0.0280                | 0.0054     | -0.0038    | 0.0016     |
| N14...H20    | 2.1673       | 0.0208        | 0.0665                | 0.0157     | -0.0148    | 0.0009     |
| N10...H26    | 2.1665       | 0.0208        | 0.0666                | 0.0158     | -0.0149    | 0.0009     |
| N12...H32    | 2.1674       | 0.0208        | 0.0665                | 0.0157     | -0.0148    | 0.0009     |

**(2,4) Couple of 1a.**

|                             | Involved Group | Bond (X...Y) | R <sub>AB</sub> (Å) | $\rho_b$ (au) | $\nabla^2\rho_b$ (au) | G <sub>b</sub> (au) | V <sub>b</sub> (au) | H <sub>b</sub> (au) |
|-----------------------------|----------------|--------------|---------------------|---------------|-----------------------|---------------------|---------------------|---------------------|
| Intermolecular interactions | Methoxy        | H75...H161   | 2.2221              | 0.0072        | 0.0255                | 0.0049              | -0.0035             | 0.0015              |
|                             |                | O85...H50    | 2.2831              | 0.0155        | 0.0560                | 0.0131              | -0.0122             | 0.0009              |
|                             |                | O53...H93    | 2.1594              | 0.0199        | 0.0695                | 0.0168              | -0.0162             | 0.0006              |
| Intramolecular interactions |                | O88...H77    | 2.2625              | 0.0161        | 0.0578                | 0.0136              | -0.0127             | 0.0009              |
|                             |                | O87...H81    | 2.1508              | 0.0199        | 0.0705                | 0.0170              | -0.0163             | 0.0007              |
|                             |                | O84...H63    | 2.2457              | 0.0167        | 0.0601                | 0.0142              | -0.0133             | 0.0009              |
|                             |                | O83...H69    | 2.3824              | 0.0162        | 0.0642                | 0.0142              | -0.0123             | 0.0019              |
|                             | Methoxy        | O149...H18   | 2.1713              | 0.0194        | 0.0678                | 0.0164              | -0.0158             | 0.0006              |
|                             |                | O181...H146  | 2.2827              | 0.0153        | 0.0557                | 0.0130              | -0.0121             | 0.0009              |
|                             |                | O183...H177  | 2.1755              | 0.0195        | 0.0673                | 0.0163              | -0.0158             | 0.0005              |
|                             |                | O184...H173  | 2.3507              | 0.0137        | 0.0502                | 0.0116              | -0.0106             | 0.0010              |
|                             |                | O180...H159  | 2.2870              | 0.0154        | 0.0560                | 0.0131              | -0.0121             | 0.0010              |
|                             |                | O179...H165  | 2.4039              | 0.0159        | 0.0633                | 0.0140              | -0.0121             | 0.0019              |
|                             |                | H65...H68    | 2.3512              | 0.0061        | 0.0254                | 0.0049              | -0.0034             | 0.0015              |
|                             |                | H161...H164  | 2.2973              | 0.0068        | 0.0272                | 0.0052              | -0.0037             | 0.0015              |

**(2,4) Couple of 1b.**

|                             | Involved Group                      | Bond (X...Y) | $R_{AB}$ (Å) | $\rho_b$ (au) | $\nabla^2\rho_b$ (au) | $G_b$ (au) | $V_b$ (au) | $H_b$ (au) |
|-----------------------------|-------------------------------------|--------------|--------------|---------------|-----------------------|------------|------------|------------|
| Intermolecular interactions | Methoxy                             | O90...H228   | 2.4393       | 0.0102        | 0.0348                | 0.0081     | -0.0074    | 0.0007     |
|                             |                                     | O90...H175   | 2.7566       | 0.0063        | 0.0246                | 0.0050     | -0.0039    | 0.0011     |
|                             |                                     | O203...H105  | 2.4877       | 0.0097        | 0.0326                | 0.0075     | -0.0068    | 0.0007     |
|                             | Carbazolyl (C)<br>Methoxy           | C22...H224   | 2.7628       | 0.0084        | 0.0306                | 0.0060     | -0.0043    | 0.0017     |
|                             |                                     | C68...H208   | 2.5575       | 0.0103        | 0.0349                | 0.0072     | -0.0056    | 0.0016     |
|                             |                                     | C17...O200   | 3.1203       | 0.0080        | 0.0274                | 0.0060     | -0.0052    | 0.0008     |
|                             |                                     | C76...O203   | 3.1277       | 0.0080        | 0.0274                | 0.0061     | -0.0053    | 0.0008     |
|                             |                                     | C140...C80   | 3.2167       | 0.0079        | 0.0247                | 0.0050     | -0.0037    | 0.0013     |
| Intramolecular interactions | Thiophenyl (S, C)<br>Carbazolyl (H) | S35...H54    | 2.7982       | 0.0092        | 0.0340                | 0.0067     | -0.0049    | 0.0018     |
|                             |                                     | S42...H75    | 2.8166       | 0.0087        | 0.0317                | 0.0062     | -0.0045    | 0.0017     |
|                             |                                     | S9...H24     | 2.8328       | 0.0086        | 0.0319                | 0.0062     | -0.0044    | 0.0018     |
|                             |                                     | S123...H138  | 2.7351       | 0.0104        | 0.0382                | 0.0076     | -0.0057    | 0.0019     |
|                             |                                     | S156...H189  | 2.7176       | 0.0105        | 0.0381                | 0.0077     | -0.0058    | 0.0019     |
|                             |                                     | S149...H168  | 2.7238       | 0.0103        | 0.0375                | 0.0075     | -0.0057    | 0.0018     |
|                             |                                     | C36...H57    | 2.6367       | 0.0094        | 0.0346                | 0.0067     | -0.0048    | 0.0019     |
|                             |                                     | C43...H72    | 2.6039       | 0.0101        | 0.0380                | 0.0074     | -0.0053    | 0.0021     |
|                             |                                     | C10...H21    | 2.5992       | 0.0101        | 0.0382                | 0.0074     | -0.0053    | 0.0021     |
|                             |                                     | C124...H135  | 2.6649       | 0.0090        | 0.0343                | 0.0066     | -0.0046    | 0.0020     |
|                             | C157...H186                         | 2.5867       | 0.0108       | 0.0433        | 0.0083                | -0.0058    | 0.0025     |            |
| C150...H171                 | 2.6681                              | 0.0090       | 0.0335       | 0.0065        | -0.0046               | 0.0019     |            |            |

**(2,4) Couple of 1c.**

|                             | Involved Group                      | Bond (X...Y) | $R_{AB}$ (Å) | $\rho_b$ (au) | $\nabla^2\rho_b$ (au) | $G_b$ (au) | $V_b$ (au) | $H_b$ (au) |
|-----------------------------|-------------------------------------|--------------|--------------|---------------|-----------------------|------------|------------|------------|
| Intermolecular interactions | Methyl                              | H99...H214   | 2.2276       | 0.0075        | 0.0271                | 0.0052     | -0.0037    | 0.0015     |
|                             |                                     | C104...H194  | 2.6264       | 0.0080        | 0.0312                | 0.0061     | -0.0045    | 0.0016     |
|                             |                                     | C84...H206   | 2.6352       | 0.0077        | 0.0301                | 0.0059     | -0.0044    | 0.0015     |
|                             | Carbazolyl (C)<br>Methyl (H)        | C178...H95   | 2.6132       | 0.0098        | 0.0315                | 0.0066     | -0.0053    | 0.0013     |
|                             |                                     | C164...H102  | 2.6481       | 0.0092        | 0.0298                | 0.0062     | -0.0049    | 0.0013     |
|                             |                                     | C180...H93   | 2.8281       | 0.0074        | 0.0244                | 0.0048     | -0.0036    | 0.0012     |
|                             |                                     | C75...H194   | 2.7937       | 0.0068        | 0.0243                | 0.0048     | -0.0035    | 0.0013     |
|                             |                                     | C128...H90   | 2.6713       | 0.0088        | 0.0286                | 0.0059     | -0.0047    | 0.0012     |
|                             |                                     | C50...C131   | 3.1820       | 0.0084        | 0.0258                | 0.0053     | -0.0041    | 0.0012     |
| C130...C88                  | 3.3692                              | 0.0069       | 0.0239       | 0.0048        | -0.0036               | 0.0012     |            |            |
| Intramolecular interactions | Thiophenyl (S, C)<br>Carbazolyl (H) | S9...H24     | 2.7272       | 0.0102        | 0.0381                | 0.0076     | -0.0057    | 0.0019     |
|                             |                                     | S35...H54    | 2.7283       | 0.0101        | 0.0368                | 0.0074     | -0.0056    | 0.0018     |
|                             |                                     | S42...H74    | 2.6865       | 0.0107        | 0.0395                | 0.0080     | -0.0062    | 0.0018     |
|                             |                                     | S143...H162  | 2.7935       | 0.0096        | 0.0356                | 0.0070     | -0.0051    | 0.0019     |
|                             |                                     | S150...H182  | 2.7035       | 0.0107        | 0.0390                | 0.0079     | -0.0060    | 0.0019     |
|                             |                                     | S117...H132  | 2.9349       | 0.0080        | 0.0304                | 0.0059     | -0.0041    | 0.0017     |
|                             |                                     | C144...H165  | 2.6247       | 0.0096        | 0.0358                | 0.0069     | -0.0049    | 0.0020     |
|                             |                                     | C151...H179  | 2.5761       | 0.0106        | 0.0408                | 0.0080     | -0.0057    | 0.0023     |
|                             | C36...H57                           | 2.5730       | 0.0109       | 0.0429        | 0.0083                | -0.0059    | 0.0024     |            |
|                             | Carbazolyl                          | H13...H21    | 2.0731       | 0.0122        | 0.0498                | 0.0097     | -0.0070    | 0.0027     |
| Thioph...Carbaz             | H46...H71                           | 2.0867       | 0.0124       | 0.0515        | 0.0100                | -0.0071    | 0.0029     |            |

**(2,4) Couple of 2a.**

|                             | Involved Group | Bond (X...Y) | $R_{AB}$ (Å) | $\rho_b$ (au) | $\nabla^2\rho_b$ (au) | $G_b$ (au) | $V_b$ (au) | $H_b$ (au) |
|-----------------------------|----------------|--------------|--------------|---------------|-----------------------|------------|------------|------------|
| Intermolecular interactions | Methoxy        | O139...H50   | 2.5774       | 0.0073        | 0.0269                | 0.0059     | -0.0050    | 0.0009     |
|                             |                | H50...H142   | 2.2634       | 0.0076        | 0.0303                | 0.0058     | -0.0040    | 0.0018     |
| Intramolecular interactions |                | N10...H20    | 2.2309       | 0.0185        | 0.0647                | 0.0146     | -0.0130    | 0.0016     |
|                             |                | N12...H37    | 2.4518       | 0.0129        | 0.0485                | 0.0100     | -0.0080    | 0.0020     |
|                             | Triazolyl (N)  | N14...H29    | 2.6827       | 0.0101        | 0.0348                | 0.0072     | -0.0058    | 0.0014     |
|                             |                | Phenyl (H)   | N86...H101   | 2.7555        | 0.0086                | 0.0291     | 0.0060     | -0.0047    |
|                             | N82...H92      |              | 2.1389       | 0.0220        | 0.0741                | 0.0174     | -0.0162    | 0.0011     |
|                             | N84...H109     |              | 2.0592       | 0.0256        | 0.0826                | 0.0201     | -0.0195    | 0.0006     |
|                             | O43...H48      |              | 2.4554       | 0.0108        | 0.0415                | 0.0093     | -0.0082    | 0.0011     |
|                             |                | O67...H64    | 2.3551       | 0.0132        | 0.0486                | 0.0111     | -0.0101    | 0.0010     |
|                             | Methoxy        | O139...H136  | 2.3687       | 0.0129        | 0.0475                | 0.0109     | -0.0099    | 0.0010     |
|                             |                | O118...H133  | 2.2606       | 0.0161        | 0.0588                | 0.0137     | -0.0126    | 0.0011     |
| O115...H120                 |                | 2.2801       | 0.0154       | 0.0561        | 0.0130                | -0.0121    | 0.0009     |            |

**(2,4) Couple of 2b.**

|                             | Involved Group | Bond (X...Y) | $R_{AB}$ (Å) | $\rho_b$ (au) | $\nabla^2\rho_b$ (au) | $G_b$ (au) | $V_b$ (au) | $H_b$ (au) |        |
|-----------------------------|----------------|--------------|--------------|---------------|-----------------------|------------|------------|------------|--------|
| Intermolecular interactions | Methyl         | H104...H106  | 2.2954       | 0.0061        | 0.0222                | 0.0042     | -0.0028    | 0.0014     |        |
|                             |                | H76...H194   | 2.4542       | 0.0052        | 0.0201                | 0.0037     | -0.0025    | 0.0012     |        |
| Intramolecular interactions | Triazol (N)    | N14...H27    | 2.1507       | 0.0214        | 0.0688                | 0.0163     | -0.0154    | 0.0009     |        |
|                             |                | N4...H24     | 2.1493       | 0.0215        | 0.0687                | 0.0163     | -0.0155    | 0.0008     |        |
|                             | Thiophenyl (H) | N11...H36    | 2.1280       | 0.0224        | 0.0721                | 0.0172     | -0.0164    | 0.0008     |        |
|                             |                | N143...H136  | 2.1051       | 0.0235        | 0.0754                | 0.0181     | -0.0174    | 0.0007     |        |
|                             |                | N149...H158  | 2.1591       | 0.0211        | 0.0675                | 0.0160     | -0.0151    | 0.0009     |        |
|                             |                | N141...H161  | 2.1772       | 0.0203        | 0.0650                | 0.0153     | -0.0144    | 0.0009     |        |
|                             |                | O87...H100   | 2.2982       | 0.0153        | 0.0546                | 0.0128     | -0.0119    | 0.0009     |        |
|                             |                | O87...H99    | 2.3437       | 0.0145        | 0.0510                | 0.0120     | -0.0112    | 0.0008     |        |
|                             |                | O71...H105   | 2.4363       | 0.0119        | 0.0436                | 0.0099     | -0.0090    | 0.0009     |        |
|                             |                | O108...H128  | 2.4446       | 0.0117        | 0.0434                | 0.0099     | -0.0089    | 0.0010     |        |
|                             |                | O117...H110  | 2.3661       | 0.0138        | 0.0492                | 0.0115     | -0.0107    | 0.0008     |        |
|                             |                | O117...H133  | 2.2886       | 0.0158        | 0.0559                | 0.0132     | -0.0124    | 0.0008     |        |
|                             |                | O184...H208  | 2.4660       | 0.0108        | 0.0416                | 0.0093     | -0.0082    | 0.0010     |        |
|                             |                | Methoxy      | O188...H201  | 2.3367        | 0.0142                | 0.0512     | 0.0119     | -0.0110    | 0.0009 |
|                             |                |              | O59...H94    | 2.4169        | 0.0124                | 0.0449     | 0.0103     | -0.0094    | 0.0009 |
|                             |                |              | O67...H86    | 2.3477        | 0.0143                | 0.0504     | 0.0119     | -0.0111    | 0.0008 |
|                             |                |              | O67...H82    | 2.3312        | 0.0143                | 0.0517     | 0.0120     | -0.0111    | 0.0009 |
|                             |                |              | O185...H195  | 2.2783        | 0.0164                | 0.0581     | 0.0137     | -0.0128    | 0.0009 |
| O185...H194                 | 2.3497         |              | 0.0143       | 0.0505        | 0.0119                | -0.0111    | 0.0008     |            |        |
| O64...H76                   | 2.3449         |              | 0.1399       | 0.0503        | 0.0117                | -0.0108    | 0.0009     |            |        |
| O56...H90                   | 2.4778         |              | 0.0106       | 0.0409        | 0.0091                | -0.0080    | 0.0011     |            |        |
| O180...H207                 | 2.4409         | 0.0118       | 0.0434       | 0.0099        | -0.0089               | 0.0010     |            |            |        |

**(2,4) Couple of 2c.**

|                             | Involved Group                   | Bond (X...Y) | $R_{AB}$ (Å) | $\rho_b$ (au) | $\nabla^2\rho_b$ (au) | $G_b$ (au) | $V_b$ (au) | $H_b$ (au) |
|-----------------------------|----------------------------------|--------------|--------------|---------------|-----------------------|------------|------------|------------|
| Intermolecular interactions | Carbazolyl (C)<br>Methyl (H)     | C162...H106  | 2.7425       | 0.0078        | 0.0272                | 0.0054     | -0.0040    | 0.0014     |
|                             |                                  | C66...H210   | 2.7759       | 0.0073        | 0.0257                | 0.0051     | -0.0037    | 0.0014     |
|                             |                                  | C48...H226   | 2.7879       | 0.0071        | 0.0250                | 0.0049     | -0.0036    | 0.0013     |
|                             |                                  | C198...H98   | 2.7425       | 0.0077        | 0.0269                | 0.0053     | -0.0039    | 0.0014     |
|                             |                                  | C84...H218   | 2.7355       | 0.0077        | 0.0266                | 0.0053     | -0.0039    | 0.0014     |
|                             |                                  | C180...H114  | 2.7689       | 0.0072        | 0.0255                | 0.0050     | -0.0037    | 0.0013     |
|                             | Carbazolyl                       | C59...C156   | 3.1139       | 0.0096        | 0.0283                | 0.0059     | -0.0048    | 0.0011     |
|                             |                                  | C70...C166   | 3.2685       | 0.0082        | 0.0238                | 0.0049     | -0.0038    | 0.0011     |
|                             |                                  | C52...C202   | 3.2802       | 0.0080        | 0.0230                | 0.0047     | -0.0037    | 0.0010     |
|                             |                                  | C41...C192   | 3.0883       | 0.0100        | 0.0296                | 0.0062     | -0.0050    | 0.0012     |
|                             |                                  | C88...C184   | 3.2990       | 0.0078        | 0.0226                | 0.0046     | -0.0036    | 0.0010     |
|                             |                                  | C77...C174   | 3.1204       | 0.0095        | 0.0278                | 0.0058     | -0.0047    | 0.0011     |
| Intramolecular interactions | Triazol (N)<br>Thiophenyl (H)    | N127...H143  | 2.0987       | 0.0237        | 0.0755                | 0.0182     | -0.0175    | 0.0007     |
|                             |                                  | N129...H149  | 2.0763       | 0.0247        | 0.0790                | 0.0191     | -0.0185    | 0.0006     |
|                             |                                  | N131...H137  | 2.0760       | 0.0248        | 0.0791                | 0.0192     | -0.0186    | 0.0006     |
|                             |                                  | N14...H20    | 2.0928       | 0.0240        | 0.0767                | 0.0185     | -0.0178    | 0.0007     |
|                             |                                  | N12...H32    | 2.0591       | 0.0256        | 0.0821                | 0.0200     | -0.0194    | 0.0006     |
|                             |                                  | N10...H26    | 2.0901       | 0.0241        | 0.0770                | 0.0186     | -0.0179    | 0.0007     |
|                             | Thiophenyl (S)<br>Carbazolyl (H) | S24...H80    | 2.8047       | 0.0091        | 0.0325                | 0.0064     | -0.0047    | 0.0017     |
|                             |                                  | S30...H44    | 2.8021       | 0.0091        | 0.0325                | 0.0064     | -0.0047    | 0.0017     |
|                             |                                  | S18...H62    | 2.7999       | 0.0091        | 0.0327                | 0.0065     | -0.0047    | 0.0018     |
|                             |                                  | S147...H161  | 2.9376       | 0.0075        | 0.0274                | 0.0052     | -0.0036    | 0.0016     |
|                             |                                  | S141...H197  | 2.9241       | 0.0076        | 0.0279                | 0.0053     | -0.0037    | 0.0016     |
|                             |                                  | S135...H179  | 2.9207       | 0.0077        | 0.0280                | 0.0054     | -0.0037    | 0.0017     |



**(2,3) Couple of 1a.**

|                             | Involved Group | Bond (X...Y) | $R_{AB}$ (Å) | $\rho_b$ (au) | $\nabla^2\rho_b$ (au) | $G_b$ (au) | $V_b$ (au) | $H_b$ (au) |        |
|-----------------------------|----------------|--------------|--------------|---------------|-----------------------|------------|------------|------------|--------|
| Intermolecular interactions | Triazine       | C2...C98     | 3.0609       | 0.0079        | 0.0301                | 0.0059     | -0.0043    | 0.0016     |        |
|                             |                | C1...C99     | 3.0787       | 0.0078        | 0.0293                | 0.0058     | -0.0042    | 0.0016     |        |
|                             | Methoxy        | O85...H168   | 2.4291       | 0.0108        | 0.0391                | 0.0088     | -0.0079    | 0.0009     |        |
|                             |                | C165...H78   | 2.7362       | 0.0066        | 0.0276                | 0.0052     | -0.0035    | 0.0017     |        |
| Intramolecular interactions |                | O84...H49    | 2.2831       | 0.0155        | 0.0559                | 0.0131     | -0.0122    | 0.0009     |        |
|                             |                | O83...H62    | 2.2457       | 0.0167        | 0.0601                | 0.0142     | -0.0133    | 0.0009     |        |
|                             |                | O82...H68    | 2.3824       | 0.0162        | 0.0641                | 0.0142     | -0.0123    | 0.0019     |        |
|                             |                | O52...H92    | 2.1594       | 0.0199        | 0.0694                | 0.0168     | -0.0162    | 0.0006     |        |
|                             |                | O86...H80    | 2.1508       | 0.0199        | 0.0704                | 0.0170     | -0.0163    | 0.0007     |        |
|                             |                | O87...H76    | 2.2625       | 0.0160        | 0.0579                | 0.0136     | -0.0127    | 0.0009     |        |
|                             |                | Methoxy      | O148...H188  | 2.1138        | 0.0216                | 0.0754     | 0.0184     | -0.0179    | 0.0005 |
|                             |                |              | O179...H158  | 2.2831        | 0.0156                | 0.0564     | 0.0132     | -0.0123    | 0.0009 |
|                             |                |              | O180...H145  | 2.3049        | 0.0148                | 0.0536     | 0.0125     | -0.0116    | 0.0009 |
|                             |                |              | O182...H176  | 2.1237        | 0.0213                | 0.0736     | 0.0180     | -0.0176    | 0.0004 |
|                             |                |              | O183...H172  | 2.2927        | 0.0150                | 0.0548     | 0.0128     | -0.0118    | 0.0010 |
|                             |                |              | H64...H67    | 2.3512        | 0.0061                | 0.0254     | 0.0049     | -0.0034    | 0.0015 |
|                             |                | H160...H163  | 2.3103       | 0.0066        | 0.0262                | 0.0051     | -0.0036    | 0.0015     |        |

**(2,3) Couple of 1b.**

|                             | Involved Group    | Bond (X...Y) | $R_{AB}$ (Å) | $\rho_b$ (au) | $\nabla^2\rho_b$ (au) | $G_b$ (au) | $V_b$ (au) | $H_b$ (au) |
|-----------------------------|-------------------|--------------|--------------|---------------|-----------------------|------------|------------|------------|
| Intermolecular interactions |                   | H24...H125   | 2.7054       | 0.0078        | 0.0310                | 0.0059     | -0.0041    | 0.0018     |
|                             | Thiophenyl        | H24...H127   | 2.3506       | 0.0064        | 0.0266                | 0.0049     | -0.0032    | 0.0017     |
|                             | Carbazolyl        | H54...H153   | 2.1158       | 0.0088        | 0.0338                | 0.0066     | -0.0048    | 0.0018     |
|                             |                   | H81...H160   | 2.8395       | 0.0069        | 0.0272                | 0.0052     | -0.0035    | 0.0017     |
|                             | Thiophenyl (C)    | C157...H75   | 2.5618       | 0.0095        | 0.0369                | 0.0073     | -0.0054    | 0.0019     |
|                             | Carbazolyl (H)    | C49...H171   | 2.6205       | 0.0091        | 0.0353                | 0.0069     | -0.0049    | 0.0020     |
|                             |                   | S149...C8    | 3.1668       | 0.0117        | 0.0389                | 0.0079     | -0.0062    | 0.0017     |
|                             | Thiophenyl        | S123...C41   | 3.2448       | 0.0100        | 0.0321                | 0.0065     | -0.0050    | 0.0015     |
|                             |                   | S9...H125    | 2.9626       | 0.0077        | 0.0266                | 0.0050     | -0.0034    | 0.0016     |
|                             |                   | N4...C116    | 3.1157       | 0.0078        | 0.0259                | 0.0055     | -0.0045    | 0.0010     |
|                             | Triazine          | N119...C1    | 3.1075       | 0.0080        | 0.0265                | 0.0057     | -0.0047    | 0.0010     |
|                             |                   | N6...C115    | 3.1117       | 0.0080        | 0.0269                | 0.0057     | -0.0047    | 0.0010     |
|                             |                   | N120...C2    | 3.1058       | 0.0082        | 0.0270                | 0.0057     | -0.0046    | 0.0011     |
| Intramolecular interactions |                   | S156...H189  | 2.8564       | 0.0081        | 0.0294                | 0.0057     | -0.0040    | 0.0017     |
|                             |                   | S42...H75    | 2.8166       | 0.0087        | 0.0320                | 0.0063     | -0.0045    | 0.0017     |
|                             |                   | S123...H138  | 2.7873       | 0.0096        | 0.0356                | 0.0070     | -0.0051    | 0.0019     |
|                             |                   | S35...H54    | 2.7982       | 0.0093        | 0.0344                | 0.0068     | -0.0049    | 0.0018     |
|                             | Thiophenyl (S, C) | S149...H168  | 2.8115       | 0.0091        | 0.0339                | 0.0066     | -0.0048    | 0.0018     |
|                             | Carbazolyl (H)    | S9...H24     | 2.8328       | 0.0087        | 0.0322                | 0.0063     | -0.0045    | 0.0018     |
|                             |                   | C157...H186  | 2.5926       | 0.0103        | 0.0390                | 0.0076     | -0.0055    | 0.0021     |
|                             |                   | C36...H57    | 2.6367       | 0.0094        | 0.0346                | 0.0067     | -0.0048    | 0.0019     |
|                             |                   | C124...H135  | 2.6782       | 0.0087        | 0.0318                | 0.0062     | -0.0044    | 0.0018     |
|                             |                   | C43...H72    | 2.6039       | 0.0101        | 0.0379                | 0.0074     | -0.0053    | 0.0021     |
|                             | C150...H171       | 2.6680       | 0.0089       | 0.0322        | 0.0063                | -0.0045    | 0.0018     |            |

**(2,3) Couple of 1c.**

|                             | Involved Group    | Bond (X...Y) | $R_{AB}$ (Å) | $\rho_b$ (au) | $\nabla^2\rho_b$ (au) | $G_b$ (au) | $V_b$ (au) | $H_b$ (au) |
|-----------------------------|-------------------|--------------|--------------|---------------|-----------------------|------------|------------|------------|
| Intermolecular interactions | Thiophenyl        | H46...H182   | 2.1480       | 0.0097        | 0.0402                | 0.0077     | -0.0054    | 0.0023     |
|                             | Carbazolyl        | H39...H162   | 2.2938       | 0.0073        | 0.0298                | 0.0055     | -0.0036    | 0.0019     |
|                             | Carbazolyl        | C161...H57   | 2.7225       | 0.0085        | 0.0287                | 0.0056     | -0.0041    | 0.0015     |
|                             |                   | S9...C149    | 3.1742       | 0.0116        | 0.0375                | 0.0077     | -0.0061    | 0.0016     |
|                             |                   | S35...C116   | 3.2780       | 0.0098        | 0.0332                | 0.0065     | -0.0047    | 0.0018     |
|                             | Thiophenyl        | S42...C142   | 3.0550       | 0.0144        | 0.0454                | 0.0097     | -0.0081    | 0.0016     |
|                             |                   | S117...C8    | 3.2874       | 0.0093        | 0.0291                | 0.0059     | -0.0046    | 0.0013     |
|                             |                   | S143...C34   | 3.3282       | 0.0087        | 0.0267                | 0.0054     | -0.0041    | 0.0013     |
|                             |                   | S150...C41   | 3.3312       | 0.0086        | 0.0278                | 0.0055     | -0.0041    | 0.0014     |
|                             |                   | Triazine     | N5...C109    | 3.1506        | 0.0075                | 0.0247     | 0.0052     | -0.0043    |
| Intramolecular interactions |                   | S150...H182  | 2.8589       | 0.0088        | 0.0332                | 0.0064     | -0.0046    | 0.0018     |
|                             |                   | S42...H74    | 2.6865       | 0.0107        | 0.0394                | 0.0080     | -0.0062    | 0.0018     |
|                             |                   | S143...H162  | 2.8624       | 0.0085        | 0.0326                | 0.0063     | -0.0045    | 0.0018     |
|                             |                   | S35...H54    | 2.7283       | 0.0101        | 0.0367                | 0.0074     | -0.0056    | 0.0018     |
|                             | Thiophenyl (S, C) | S117...H132  | 2.8056       | 0.0093        | 0.0353                | 0.0069     | -0.0050    | 0.0019     |
|                             | Carbazolyl (H)    | S9...H24     | 2.7272       | 0.0102        | 0.0381                | 0.0076     | -0.0057    | 0.0019     |
|                             |                   | C151...H179  | 2.6520       | 0.0091        | 0.0322                | 0.0063     | -0.0046    | 0.0017     |
|                             |                   | C36...H57    | 2.5730       | 0.0108        | 0.0431                | 0.0084     | -0.0060    | 0.0024     |
|                             |                   | C118...H129  | 2.5776       | 0.0110        | 0.0441                | 0.0085     | -0.0060    | 0.0025     |
|                             |                   | C144...H165  | 2.5334       | 0.0115        | 0.0437                | 0.0086     | -0.0063    | 0.0023     |
|                             | Thiophenyl        | H13...H21    | 2.0731       | 0.0122        | 0.0502                | 0.0098     | -0.0071    | 0.0027     |
| Carbazolyl                  | H46...H71         | 2.0867       | 0.0123       | 0.0519        | 0.0101                | -0.0072    | 0.0029     |            |

**(2,3) Couple of 2a.**

|                             | Involved Group   | Bond (X...Y) | $R_{AB}$ (Å) | $\rho_b$ (au) | $\nabla^2\rho_b$ (au) | $G_b$ (au) | $V_b$ (au) | $H_b$ (au) |
|-----------------------------|------------------|--------------|--------------|---------------|-----------------------|------------|------------|------------|
| Intermolecular interactions | Triazolyl (N)    | N14...H103   | 2.5185       | 0.0112        | 0.0421                | 0.0087     | -0.0068    | 0.0019     |
|                             | Phenyl (H)       | N87...H20    | 2.5514       | 0.0109        | 0.0394                | 0.0080     | -0.0062    | 0.0018     |
|                             |                  | H29...H103   | 2.1263       | 0.0080        | 0.0330                | 0.0064     | -0.0046    | 0.0018     |
|                             | Phenyl           | H20...H94    | 2.2661       | 0.0066        | 0.0278                | 0.0052     | -0.0034    | 0.0018     |
|                             |                  | H37...H111   | 2.1649       | 0.0076        | 0.0315                | 0.0060     | -0.0042    | 0.0018     |
|                             | Methoxy...Phenyl | H24...H124   | 2.1250       | 0.0093        | 0.0367                | 0.0072     | -0.0053    | 0.0019     |
|                             | Methoxy          | H41...H130   | 2.1024       | 0.0098        | 0.0393                | 0.0077     | -0.0057    | 0.0020     |
|                             | Triazine         | N5...C75     | 3.1895       | 0.0072        | 0.0238                | 0.0052     | -0.0044    | 0.0008     |
|                             |                  | N77...C1     | 3.1943       | 0.0074        | 0.0240                | 0.0053     | -0.0046    | 0.0007     |
|                             | Triazol          | N10...C79    | 3.1790       | 0.0073        | 0.0240                | 0.0051     | -0.0042    | 0.0009     |
| Intramolecular interactions |                  | N14...H29    | 2.6689       | 0.0100        | 0.0351                | 0.0073     | -0.0057    | 0.0016     |
|                             |                  | N10...H20    | 2.1607       | 0.0211        | 0.0700                | 0.0164     | -0.0154    | 0.0010     |
|                             |                  | N12...H37    | 2.3718       | 0.0142        | 0.0502                | 0.0109     | -0.0092    | 0.0017     |
|                             | Triazolyl (N)    | N84...H109   | 2.0592       | 0.0255        | 0.0828                | 0.0201     | -0.0195    | 0.0006     |
|                             | Phenyl (H)       | N85...H29    | 2.1689       | 0.0188        | 0.0618                | 0.0145     | -0.0136    | 0.0009     |
|                             |                  | N83...H37    | 2.5262       | 0.0107        | 0.0376                | 0.0078     | -0.0063    | 0.0015     |
|                             |                  | N82...H92    | 2.1389       | 0.0219        | 0.0742                | 0.0174     | -0.0162    | 0.0012     |
|                             |                  | N86...H101   | 2.7555       | 0.0086        | 0.0291                | 0.0060     | -0.0047    | 0.0013     |
|                             |                  | O43...H48    | 2.2975       | 0.0150        | 0.0543                | 0.0126     | -0.0116    | 0.0010     |
|                             |                  | O46...H61    | 2.2979       | 0.0150        | 0.0544                | 0.0126     | -0.0116    | 0.0010     |
|                             | Methoxy          | O67...H64    | 2.2990       | 0.0148        | 0.0536                | 0.0125     | -0.0115    | 0.0010     |
|                             |                  | O115...H120  | 2.2801       | 0.0154        | 0.0560                | 0.0130     | -0.0121    | 0.0009     |
|                             |                  | O118...H133  | 2.2606       | 0.0161        | 0.0588                | 0.0137     | -0.0126    | 0.0011     |
|                             | O139...H136      | 2.2369       | 0.0129       | 0.0473        | 0.0109                | -0.0099    | 0.0010     |            |

**(2,3) Couple of 2b.**

|                             | Involved Group  | Bond (X...Y) | R <sub>AB</sub> (Å) | ρ <sub>b</sub> (au) | ∇ <sup>2</sup> ρ <sub>b</sub> (au) | G <sub>b</sub> (au) | V <sub>b</sub> (au) | H <sub>b</sub> (au) |
|-----------------------------|-----------------|--------------|---------------------|---------------------|------------------------------------|---------------------|---------------------|---------------------|
| Intermolecular interactions | Triazine        | N2...C112    | 3.1296              | 0.0081              | 0.0278                             | 0.0061              | -0.0051             | 0.0010              |
|                             |                 | N3...C121    | 3.1635              | 0.0080              | 0.0268                             | 0.0059              | -0.0051             | 0.0008              |
|                             |                 | N10...C111   | 3.1434              | 0.0082              | 0.0270                             | 0.0059              | -0.0050             | 0.0009              |
|                             |                 | N109...C5    | 3.1394              | 0.0083              | 0.0280                             | 0.0062              | -0.0053             | 0.0009              |
|                             |                 | N115...C7    | 3.1933              | 0.0072              | 0.0252                             | 0.0054              | -0.0046             | 0.0008              |
|                             | Triazol...Thiop | N116...C1    | 3.1543              | 0.0080              | 0.0264                             | 0.0058              | -0.0049             | 0.0009              |
|                             |                 | N124... C17  | 3.0956              | 0.0086              | 0.0261                             | 0.0057              | -0.0048             | 0.0009              |
|                             | Triazolyl       | N11... C107  | 3.1279              | 0.0077              | 0.0258                             | 0.0055              | -0.0045             | 0.0010              |
|                             |                 | N127...C8    | 3.1459              | 0.0074              | 0.0249                             | 0.0053              | -0.0043             | 0.0010              |
| Intramolecular interactions |                 | O71...H105   | 2.4363              | 0.0119              | 0.0436                             | 0.0100              | -0.0090             | 0.0009              |
|                             |                 | O87...H100   | 2.2982              | 0.0153              | 0.0546                             | 0.0128              | -0.0119             | 0.0009              |
|                             |                 | O64...H76    | 2.3449              | 0.0140              | 0.0502                             | 0.0117              | -0.0108             | 0.0009              |
|                             |                 | O56...H90    | 2.4778              | 0.0106              | 0.0409                             | 0.0091              | -0.0080             | 0.0011              |
|                             |                 | O59...H94    | 2.4169              | 0.0124              | 0.0449                             | 0.0103              | -0.0094             | 0.0009              |
|                             |                 | O67...H82    | 2.3312              | 0.0143              | 0.0517                             | 0.0120              | -0.0111             | 0.0009              |
|                             | Methoxy         | O185...H197  | 2.3141              | 0.0153              | 0.0535                             | 0.0127              | -0.0120             | 0.0007              |
|                             |                 | O185...H193  | 2.3015              | 0.0153              | 0.0545                             | 0.0128              | -0.0119             | 0.0009              |
|                             |                 | O181...H206  | 2.4495              | 0.0116              | 0.0427                             | 0.0097              | -0.0087             | 0.0010              |
|                             |                 | O184...H208  | 2.4564              | 0.0110              | 0.0420                             | 0.0094              | -0.0083             | 0.0011              |
|                             |                 | O188...H201  | 2.3704              | 0.0132              | 0.0481                             | 0.0111              | -0.0101             | 0.0010              |
|                             |                 | O148...H178  | 2.4182              | 0.0124              | 0.0450                             | 0.0103              | -0.0094             | 0.0009              |
|                             |                 | O154...H163  | 2.3683              | 0.0137              | 0.0488                             | 0.0114              | -0.0106             | 0.0008              |
|                             |                 | O154...H165  | 2.3061              | 0.0151              | 0.0540                             | 0.0126              | -0.0117             | 0.0009              |
|                             |                 | N11...H36    | 2.1280              | 0.0223              | 0.0722                             | 0.0172              | -0.0163             | 0.0009              |
|                             |                 | N4...H24     | 2.1493              | 0.0215              | 0.0690                             | 0.0164              | -0.0155             | 0.0009              |
|                             | Triazolyl (N)   | N117...H119  | 2.1619              | 0.0208              | 0.0669                             | 0.0158              | -0.0149             | 0.0009              |
| Thiophenyl (H)              | N127...H145     | 2.1249       | 0.0224              | 0.0726              | 0.0173                             | -0.0164             | 0.0009              |                     |
|                             | N108...H142     | 2.1384       | 0.0219              | 0.0705              | 0.0168                             | -0.0159             | 0.0009              |                     |
|                             | N14...H27       | 2.1507       | 0.0213              | 0.0689              | 0.0163                             | -0.0154             | 0.0009              |                     |

**(2,3) Couple of 2c.**

|                             | Involved Group                   | Bond (X...Y) | $R_{AB}$ (Å) | $\rho_b$ (au) | $\nabla^2\rho_b$ (au) | $G_b$ (au) | $V_b$ (au) | $H_b$ (au) |
|-----------------------------|----------------------------------|--------------|--------------|---------------|-----------------------|------------|------------|------------|
| Intermolecular interactions | Triazine                         | N122...C1    | 3.0967       | 0.0087        | 0.0288                | 0.0063     | -0.0055    | 0.0008     |
|                             |                                  | N123...C2    | 3.0911       | 0.0088        | 0.0290                | 0.0064     | -0.0055    | 0.0009     |
|                             |                                  | N121...C3    | 3.1044       | 0.0085        | 0.0284                | 0.0062     | -0.0054    | 0.0008     |
|                             |                                  | N5...C120    | 3.0888       | 0.0088        | 0.0291                | 0.0064     | -0.0055    | 0.0009     |
|                             |                                  | N4...C119    | 3.0885       | 0.0088        | 0.0291                | 0.0064     | -0.0056    | 0.0008     |
|                             |                                  | N6...C118    | 3.0889       | 0.0087        | 0.0291                | 0.0064     | -0.0055    | 0.0009     |
|                             | Triazolyl                        | N12...C125   | 3.1300       | 0.0079        | 0.0261                | 0.0055     | -0.0046    | 0.0009     |
|                             |                                  | N129...C9    | 3.1599       | 0.0074        | 0.0247                | 0.0052     | -0.0043    | 0.0009     |
|                             |                                  | N127...C8    | 3.1805       | 0.0072        | 0.0240                | 0.0051     | -0.0041    | 0.0010     |
|                             |                                  | N14...C126   | 3.1426       | 0.0077        | 0.0254                | 0.0054     | -0.0044    | 0.0010     |
|                             |                                  | N10...C124   | 3.1240       | 0.0079        | 0.0261                | 0.0056     | -0.0046    | 0.0010     |
| Intramolecular interactions | Triazol (N)<br>Thiophenyl (H)    | N12...H32    | 2.1045       | 0.0233        | 0.0753                | 0.0181     | -0.0173    | 0.0008     |
|                             |                                  | N14...H20    | 2.0927       | 0.0239        | 0.0772                | 0.0186     | -0.0179    | 0.0007     |
|                             |                                  | N10...H26    | 2.1138       | 0.0229        | 0.0742                | 0.0177     | -0.0169    | 0.0008     |
|                             |                                  | N129...H149  | 2.0763       | 0.0247        | 0.0792                | 0.0192     | -0.0185    | 0.0007     |
|                             |                                  | N127...H143  | 2.0987       | 0.0236        | 0.0757                | 0.0182     | -0.0175    | 0.0007     |
|                             | Thiophenyl (S)<br>Carbazolyl (H) | N131...H137  | 2.0760       | 0.0247        | 0.0793                | 0.0192     | -0.0186    | 0.0006     |
|                             |                                  | S18...H62    | 2.9214       | 0.0076        | 0.0272                | 0.0052     | -0.0036    | 0.0016     |
|                             |                                  | S30...H44    | 2.9309       | 0.0075        | 0.0268                | 0.0051     | -0.0036    | 0.0015     |
|                             |                                  | S24...H80    | 2.9272       | 0.0075        | 0.0270                | 0.0052     | -0.0036    | 0.0016     |
|                             |                                  | S147...H161  | 2.9376       | 0.0075        | 0.0273                | 0.0052     | -0.0036    | 0.0016     |
|                             | S141...H197                      | 2.9241       | 0.0076       | 0.0279        | 0.0053                | -0.0037    | 0.0016     |            |
|                             | S135...H179                      | 2.9207       | 0.0077       | 0.0280        | 0.0054                | -0.0037    | 0.0017     |            |
